# Supplementary material
Source: PubMed Central journal article supplement (PMC4347387)
Supplement: SD1.pdf [file SD1.pdf]

SUPPLEMENTAL TABLE 1

Electrocardiogram (EKG) findings in stage B versus stage C of the study population

| Abnormality*                          | Stage B  |         | Stage C  |         |
|---------------------------------------|----------|---------|----------|---------|
|                                       | <i>N</i> | Percent | <i>N</i> | Percent |
| Atrial fibrillation or flutter        | 1        | 5.0     | 4        | 14.8    |
| Junctional rhythm                     | 0        | 0.0     | 3        | 11.1    |
| Multiple pre-mature ventricular beats | 0        | 0.0     | 3        | 11.1    |
| Grade I atrioventricular block        | 1        | 5.0     | 2        | 7.4     |
| Grade II atrioventricular block       | 0        | 0.0     | 0        | 0.0     |
| 2:1 Atrioventricular block            | 0        | 0.0     | 0        | 0.0     |
| Grade III atrioventricular block      | 0        | 0.0     | 1        | 3.7     |
| Right bundle branch block             | 14       | 70.0    | 12       | 44.4    |
| Incomplete right bundle branch block  | 1        | 5.0     | 0        | 0.0     |
| Left bundle branch block              | 1        | 5.0     | 0        | 0.0     |
| Left anterior fascicular block        | 12       | 60.0    | 14       | 51.9    |
| Left posterior fascicular block       | 0        | 0.0     | 1        | 3.7     |
| Bradycardia (< 50 beats/minute)       | 0        | 0.0     | 5        | 18.5    |
| Cardiac pacemaker                     | 0        | 0.0     | 2        | 7.4     |

\*Some individuals had more than one abnormality. Individuals in stage A, by definition, had none of these abnormalities.
